# Supplementary material for: Merocyanine-paclitaxel conjugates for photothermal induced chemotherapy
Source: Royal Society of Chemistry journal article supplement (doi:10.1039/d0tb02569k), 2021-01-01
Supplement: d0tb02569k1.pdf [file d0tb02569k1.pdf]

# **Nanoparticles of Merocyanine-Paclitaxel Conjugates for Photothermal Induced Chemotherapy**

Yingjie Liu,<sup>a,b</sup> Xiaohua Zheng,<sup>a,b</sup> Junli Zhou,<sup>b</sup> and Zhigang Xie <sup>\*a,b</sup>

<sup>a</sup>State Key Laboratory of Polymer Physics and Chemistry, Changchun Institute of Applied Chemistry Chinese Academy of Sciences, Changchun 130022, P .R. China.

E-mail: xiez@ciac.ac.cn

<sup>b</sup>University of Science and technology of China, Hefei 230026, P. R. China.

## Table of content

|                                            |    |
|--------------------------------------------|----|
| Synthesis process of MC-PTX                | S1 |
| UV-vis sperums of MC-PTX                   | S2 |
| <sup>1</sup> H-NMR and MODI-TOF of MC-PTX  | S3 |
| MTT results (bathed in ice water mixture)  | S4 |
| DLS results of MC-PTX NPs after irradiated | S5 |
| MTT results (different endocytosis time)   | S6 |
| High performance liquid chromatography     | S7 |
| Photothermal calculation                   | S8 |

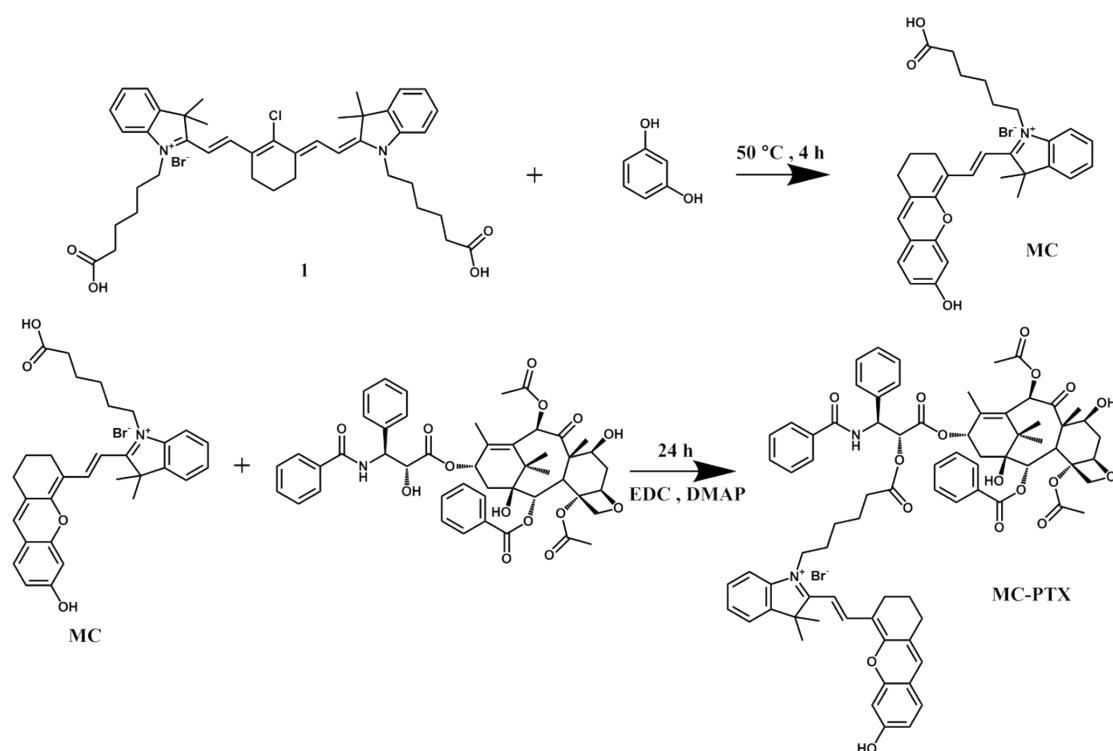

**Figure S1.** The synthesis process of MC-PTX.

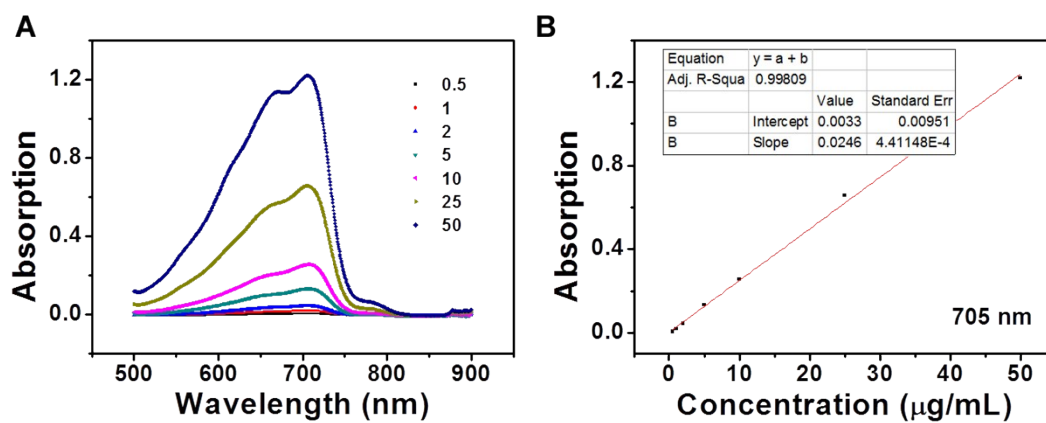

**Figure S2.** A) Ultraviolet-Visible Spectrum of MC-PTX of different concentration (DMF/H<sub>2</sub>O=9/1). B) Fitting curve of absorbance value in A at 705 nm.

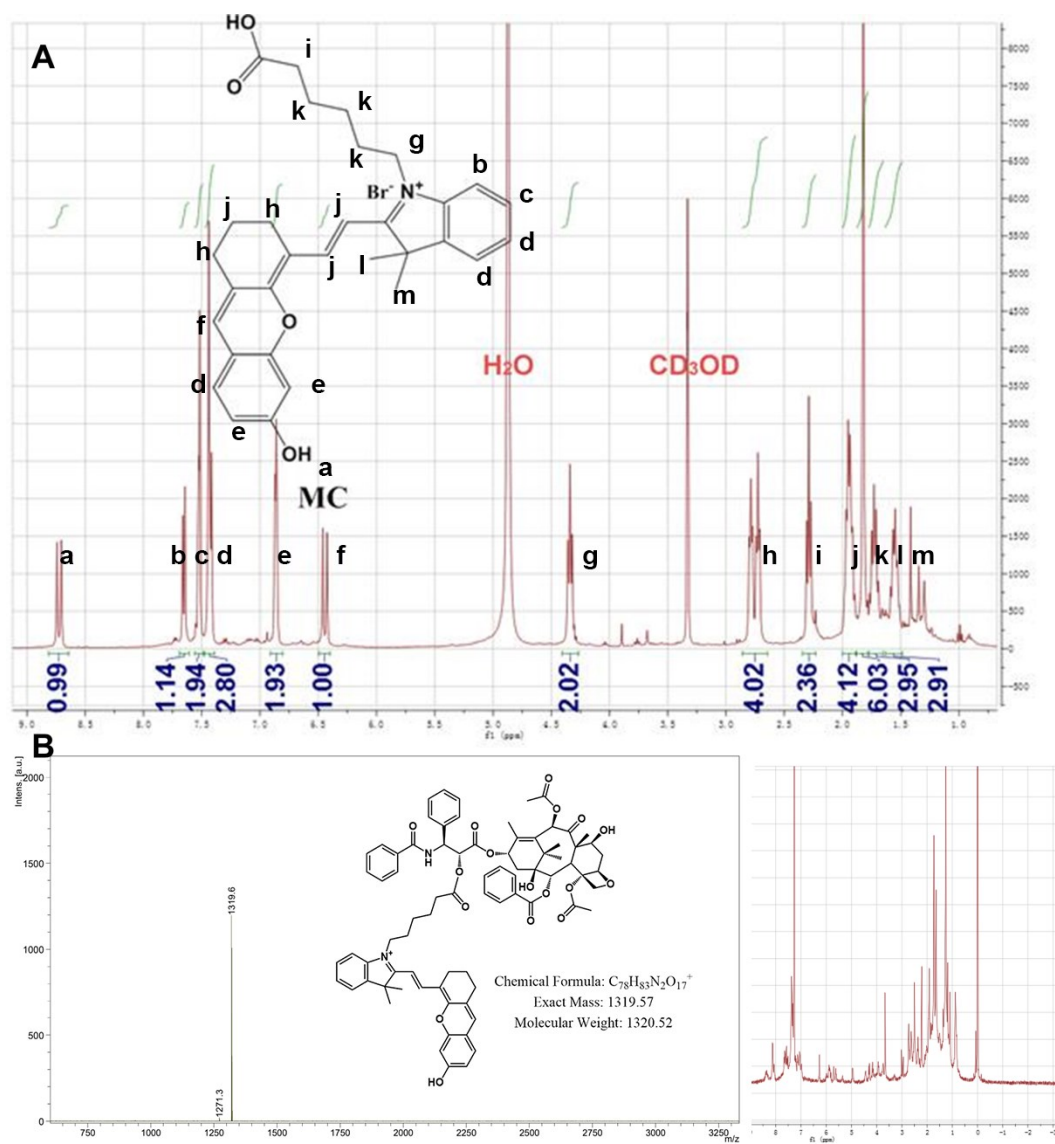

**Figure S3.** A) <sup>1</sup>H-NMR result of MC. B) <sup>1</sup>H-NMR and MODI-TOF results of MC-PTX.

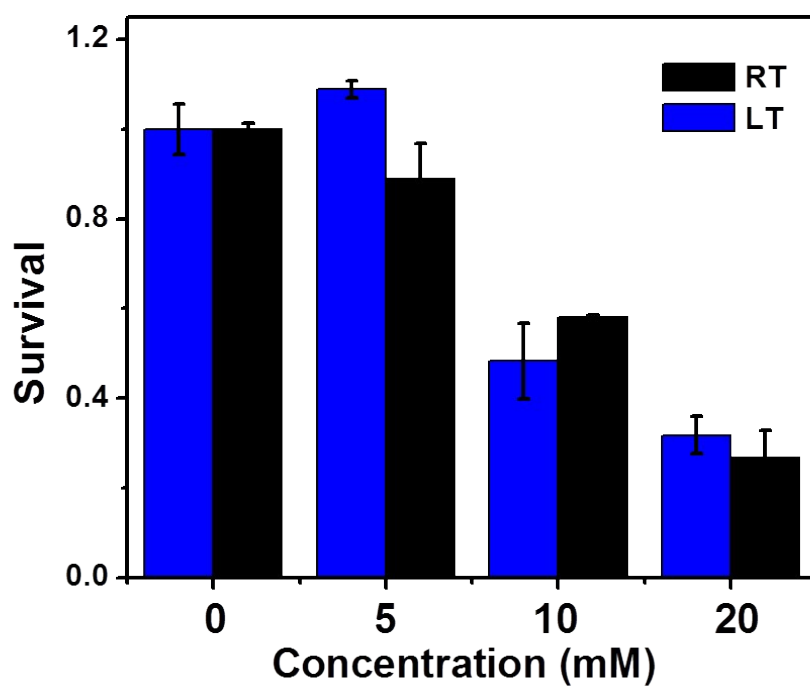

**Figure S4.** MTT results of HeLa cells treated with MC-PTX NPs after irradiated with 638 nm ( $0.8 \text{ W/cm}^2$ ) for 5 min. The blue cubes refer to groups bathed in ice water mixture during irradiated, while black groups were in room temperature.

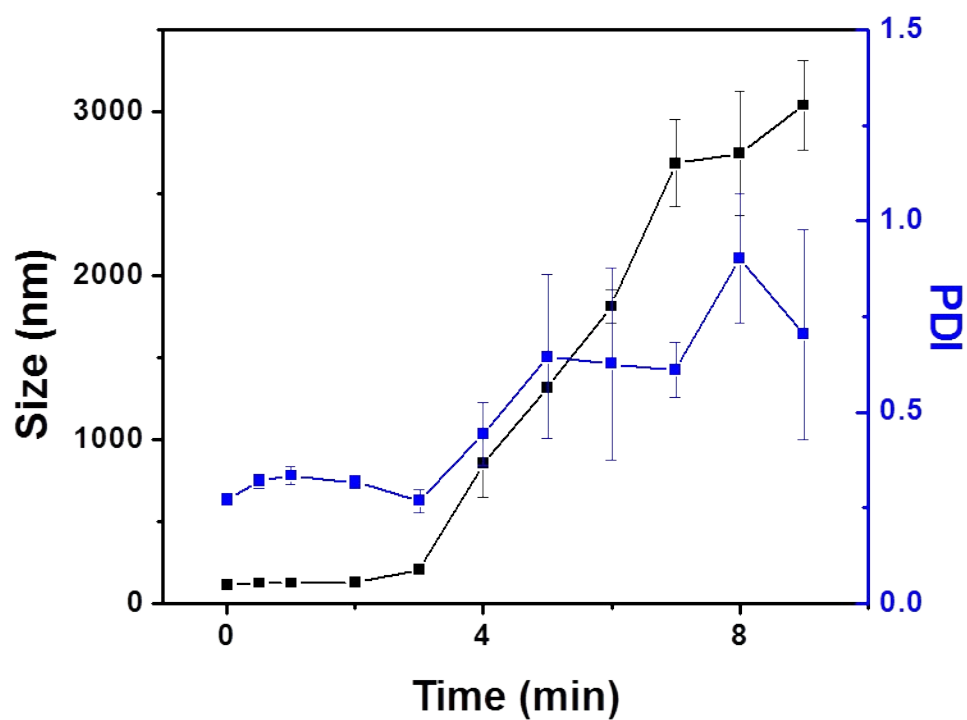

**Figure S5.** DLS result of MC-PTX NPs after irradiated for different times.

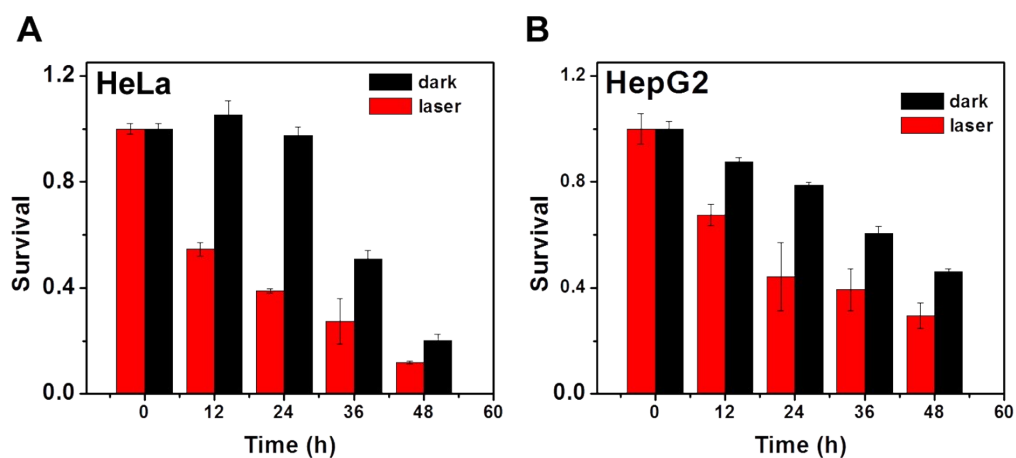

**Figure S6.** MTT result of MC-PTX NPs of different endocytosis time in HeLa and HepG2 cells. All groups were treated with MC-PTX NPs (18  $\mu$ M). The laser groups (red) were irradiated with 638 nm (0.8 W/cm<sup>2</sup>) for 5 min.

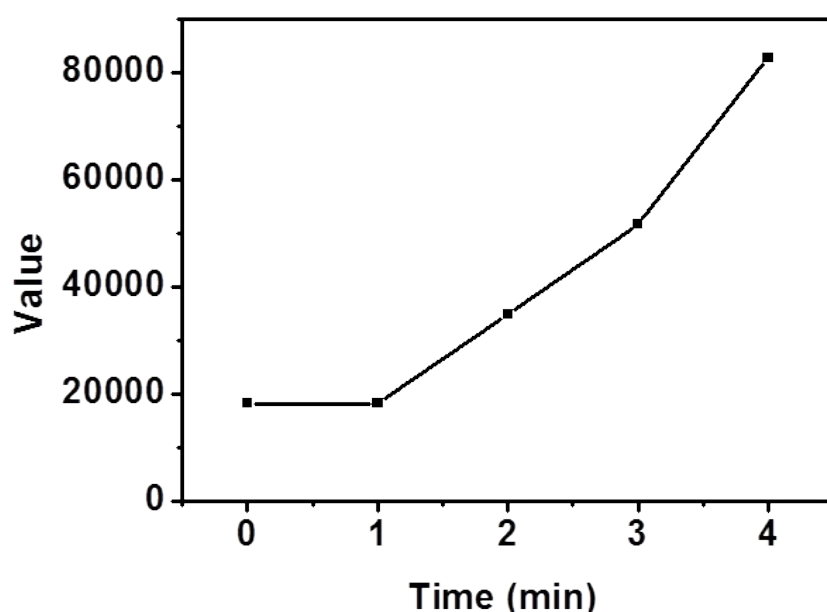

**Figure S7.** High performance liquid chromatography result. In this study, water was A phase and methanol-acetonitrile (v:v=1:1) mixture was B phase. The released

paclitaxel derivative's peak time was at 6.3 min with A/B=9/1.

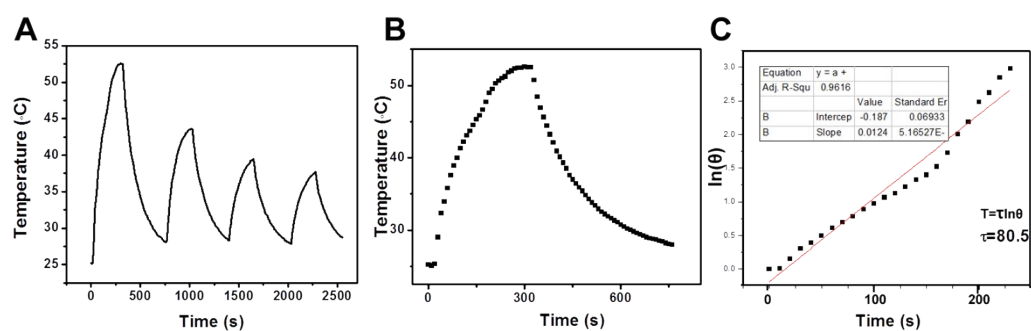

**Figure S8.** A) Photostability of MC-PTX NPs irradiated with a laser of 638 nm at 0.8 W·cm<sup>-2</sup> (300 s for each cycle). B) Photothermal effect of MC-PTX NPs at first cycle. C) Calculation of photothermal conversion efficiency.
